# Supplementary material for: A VS2@N-doped carbon hybrid with strong interfacial interaction for high-performance rechargeable aqueous Zn-ion batteries
Source: Royal Society of Chemistry journal article supplement (doi:10.1039/d1tc00531f), 2021-01-01
Supplement: d1tc00531f1.pdf [file d1tc00531f1.pdf]

# VS<sub>2</sub>@N-doped carbon hybrid with strong interfacial interaction for high-performance rechargeable aqueous Zn-ion batteries

*Jiapeng Liu<sup>a</sup>, Wenchao Peng<sup>b</sup>, Yang Li<sup>b</sup>, Fengbao Zhang<sup>b</sup> and Xiaobin Fan<sup>b\*</sup>*

<sup>a</sup> School of Chemical Engineering and Technology, National-Local Joint Engineering Laboratory for Energy Conservation in Chemical Process Integration and Resources Utilization

Hebei University of Technology, Tianjin 300130, China

<sup>b</sup> School of Chemical Engineering and Technology, State Key Laboratory of Chemical Engineering, Collaborative Innovation Center of Chemical Science and Engineering,

Tianjin University, Tianjin 300072, China

E-mail: [xiaobinfan@tju.edu.cn](mailto:xiaobinfan@tju.edu.cn)

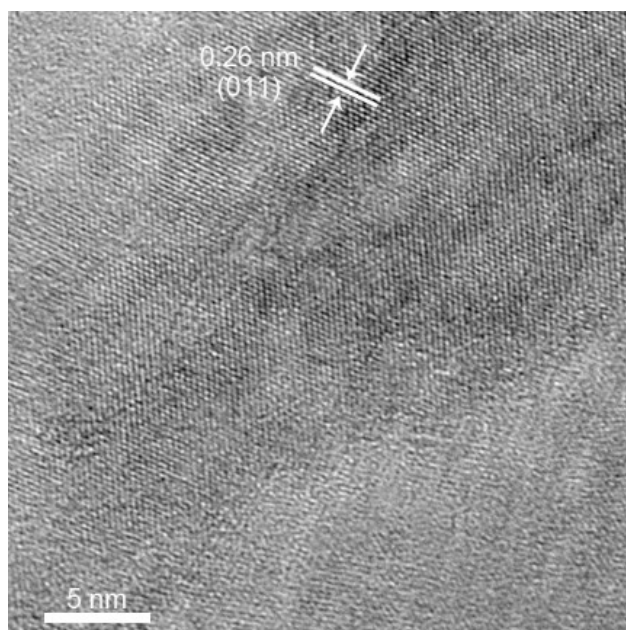

**Figure S1.** Representative high-resolution TEM of the VS<sub>2</sub>@N-C hybrid.

**Table S1.** The comparison of aqueous Zn-ion batteries performance for VS<sub>2</sub>@N-C hybrid with other vanadium sulfide based materials.

| Materials                        | Specific capacity<br>(Current density; A g <sup>-1</sup> ) | Capacity retention<br>(cycles numbers) | Ref       |
|----------------------------------|------------------------------------------------------------|----------------------------------------|-----------|
| VS <sub>2</sub> @N-C hybrid      | 203 (0.05)                                                 | 97% (600)                              | This work |
| VS <sub>2</sub> nanosheets       | 143.3 (0.1)                                                | 83.6% (350)                            | 1         |
| Rose-like VS <sub>2</sub>        | 190.3 (0.05)                                               | 98% (200)                              | 2         |
| VS <sub>2</sub> Nanosheet        | 150 (0.05)                                                 | 83% (100)                              | 3         |
| Defective VS <sub>2</sub>        | 220 (0.5)                                                  | 96% (100)                              | 4         |
| VS <sub>2</sub> @VOOH            | 184.2 (0.05)                                               | 86% (200)                              | 2         |
| VS <sub>2</sub> @SS              | 187 (0.1)                                                  | 90% (200)                              | 5         |
| VS <sub>4</sub> powder           | 210 (1)                                                    | 85% (500)                              | 6         |
| Rice kernel like VS <sub>4</sub> | 135 (1)                                                    | 67.4% (100)                            | 7         |
| VS <sub>4</sub> @rGO             | 180 (1)                                                    | 93.3% (165)                            | 7         |

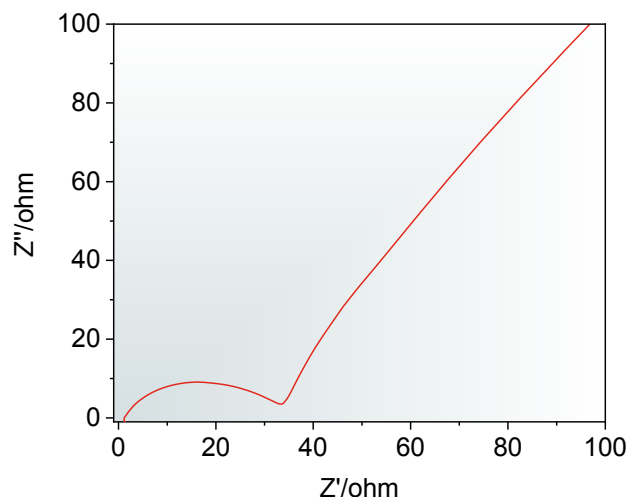

**Figure S2.** Electrochemical impedance spectroscopy of VS<sub>2</sub>@N-C hybrid.

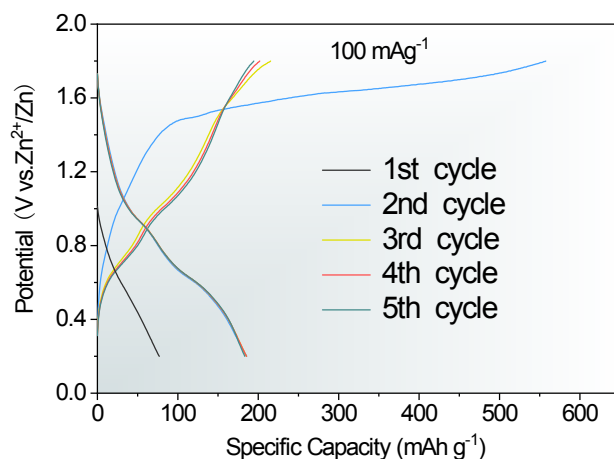

**Figure S3.** Galvanostatic charge/discharge curves of the initial five cycles at 100 mA g<sup>-1</sup>.

## References

1. J. Zhu, T. Jian, Y. Wu, W. Ma, Y. Lu, L. Sun, F. Meng, B. Wang, F. Cai, J. Gao, G. Li, L. Yang, X. Yan and C. Xu, *Appl. Surf. Sci.*, 2021, **544**, 148882.
2. X. Pu, T. Song, L. Tang, Y. Tao, T. Cao, Q. Xu, H. Liu, Y. Wang and Y. Xia, *J. Power Sources*, 2019, **437**, 226917.
3. P. He, M. Yan, G. Zhang, R. Sun, L. Chen, Q. An and L. Mai, *Adv. Energy Mater.*, 2017, **7**, 1601920.
4. B.-S. Yin, S.-W. Zhang, T. Xiong, W. Shi, K. Ke, W. S. V. Lee, J. Xue and Z.-B. Wang, *New J. Chem.*, 2020, **44**, 15951-15957.
5. T. Jiao, Q. Yang, S. Wu, Z. Wang, D. Chen, D. Shen, B. Liu, J. Cheng, H. Li, L. Ma, C. Zhi and W. Zhang, *J. Mater. Chem. A*, 2019, **7**, 16330-16338.
6. Q. Zhu, Q. Xiao, B. Zhang, Z. Yan, X. Liu, S. Chen, Z. Ren and Y. Yu, *J. Mater.*

- Chem. A*, 2020, **8**, 10761-10766.
7. H. Qin, Z. Yang, L. Chen, X. Chen and L. Wang, *J. Mater. Chem. A*, 2018, **6**, 23757-23765.
